# Supplementary material
Source: Royal Society of Chemistry journal article supplement (doi:10.1039/d6ta01594h)
Supplement: d6ta01594h1.pdf [file d6ta01594h1.pdf]

## Supporting Information

### Microwave-Derived Fe<sub>2</sub>O<sub>3</sub>/rGO Electrodes for Photo-Assisted Supercapacitors with Enhanced Charge Storage

Yue Tian<sup>a</sup>, Jie Wang<sup>a,b,\*</sup>, Nan Wang<sup>a</sup>, Muhammad Iqbal<sup>c</sup>, Brian Yulianto<sup>c</sup>, Bing Ding<sup>d,e\*</sup>,  
Yusuke Yamauchi<sup>b,f,\*</sup>

- a. Key Laboratory of Integrated Regulation and Resource Development on Shallow Lakes, Ministry of Education, College of Environment, Hohai University, Nanjing 210098, China.
- b. Australian Institute for Bioengineering and Nanotechnology (AIBN), The University of Queensland, Brisbane, Queensland 4072, Australia.
- c. Advanced Functional Materials Laboratory, Faculty of Industrial Technology, Institut Teknologi Bandung, Bandung, 40132 Indonesia
- d. State Key Laboratory of Advanced Chemical Power Sources, Guizhou Meiling Power Sources Co. Ltd., Zunyi, Guizhou 563003, China
- e. Jiangsu Key Laboratory of Electrochemical Energy-Storage Technologies, College of Materials Science and Technology, Nanjing University of Aeronautics and Astronautics, Nanjing 210016, China
- f. Department of Materials Process Engineering, Graduate School of Engineering, Nagoya University, Furo-chou, Chikusa-ku, Nagoya 464-8601, Japan.

*\*Corresponding author.*

E-mail: wang.jie@hhu.edu.cn (J. W.); bing.ding@nuaa.edu.cn (B. D.);

y.yamauchi@uq.edu.au (Y. Y.)

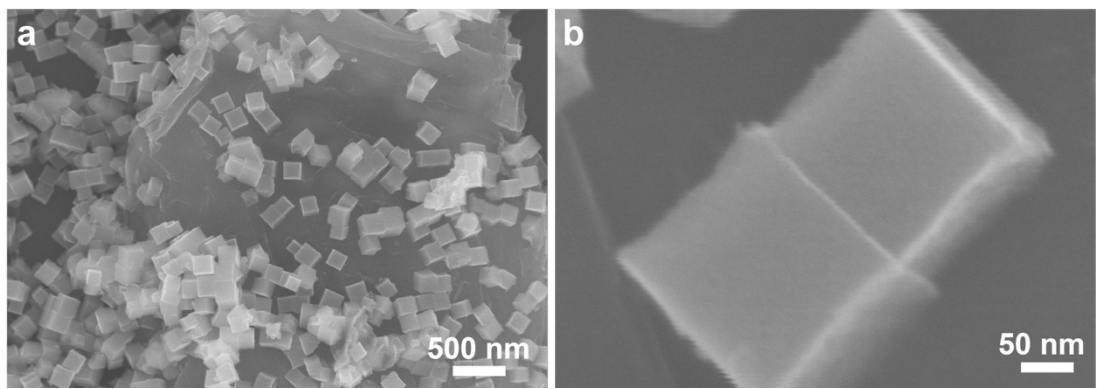

**Figure S1.** SEM images of Fe<sub>2</sub>O<sub>3</sub>/rGO.

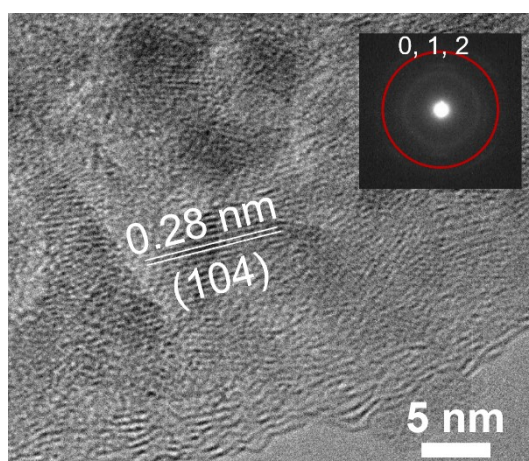

**Figure S2.** HRTEM image of Fe<sub>2</sub>O<sub>3</sub>/rGO (Inset: SAED).

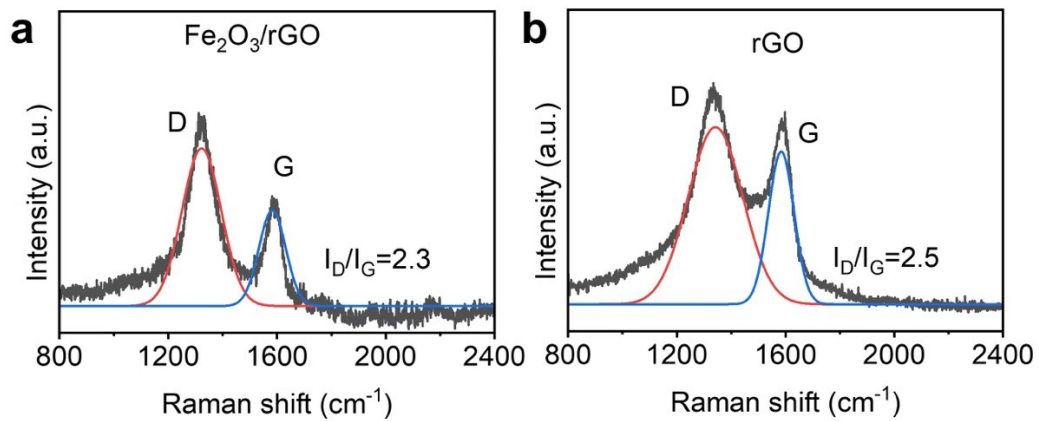

**Figure S3.** Raman spectra of (a) Fe<sub>2</sub>O<sub>3</sub>/rGO and (b) rGO.

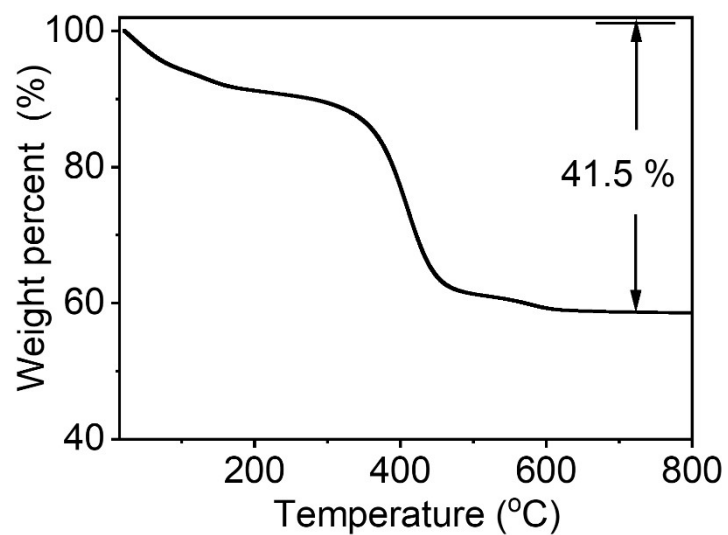

**Figure S4.** TG curve of Fe<sub>2</sub>O<sub>3</sub>/rGO.

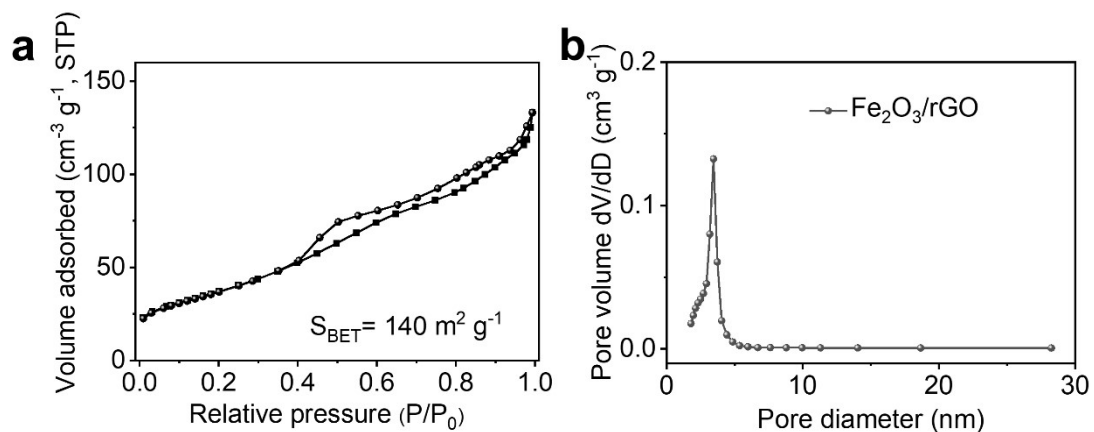

**Figure S5.** (a) N<sub>2</sub> adsorption-desorption isotherms and (b) corresponding pore size distribution curve of Fe<sub>2</sub>O<sub>3</sub>/rGO.

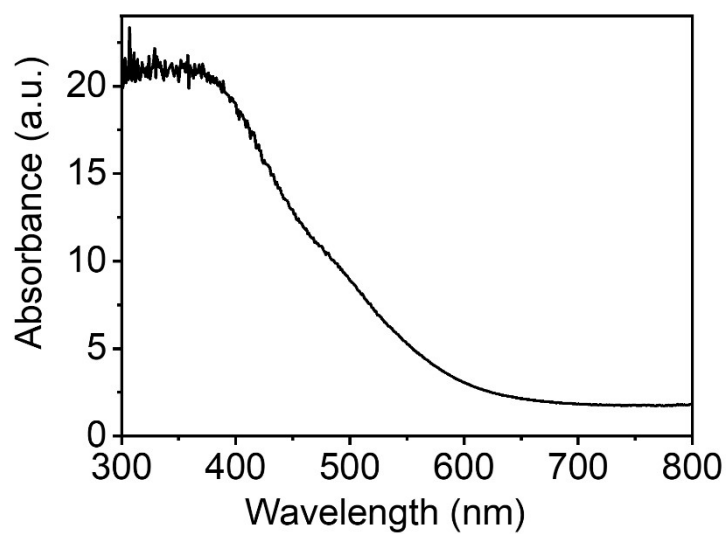

**Figure S6.** UV-Vis absorption spectrum of Fe<sub>2</sub>O<sub>3</sub>/rGO.

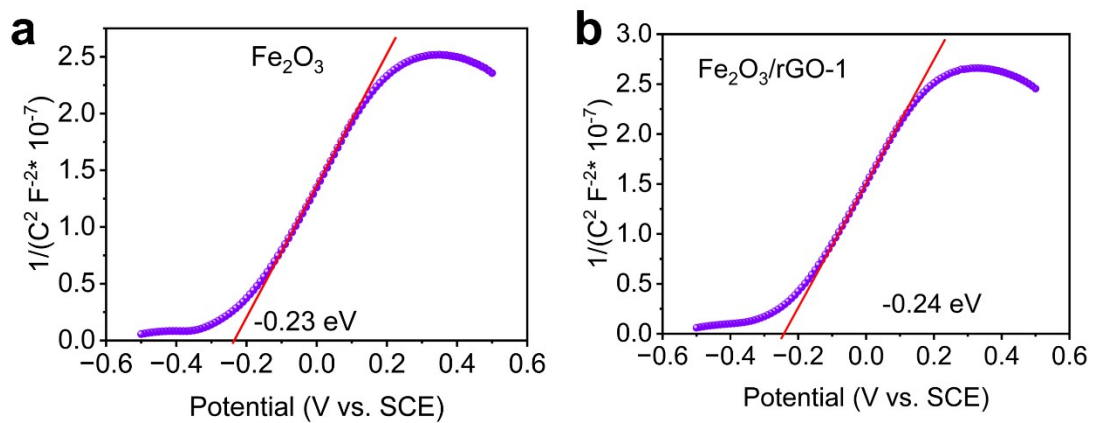

**Figure S7.** Mott-Schottky plots (a) Fe<sub>2</sub>O<sub>3</sub> and (b) Fe<sub>2</sub>O<sub>3</sub>/rGO-1 measured in 1 M KOH.

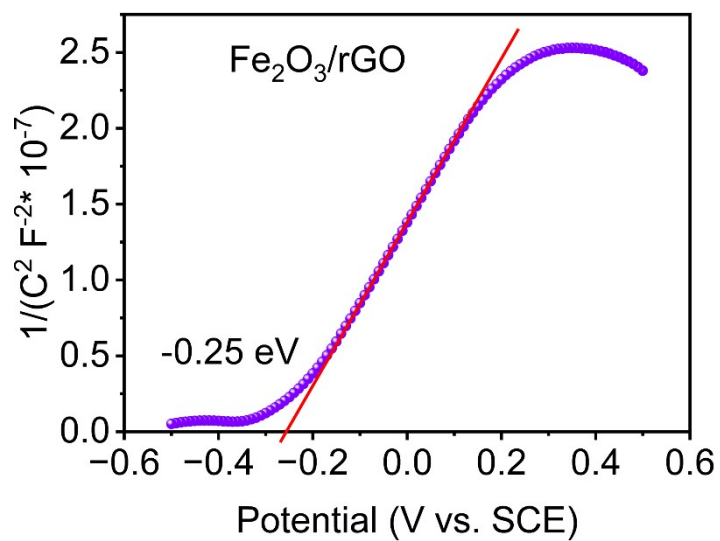

**Figure S8.** Mott-Schottky plots of Fe<sub>2</sub>O<sub>3</sub>/rGO measured in 1 M KOH.

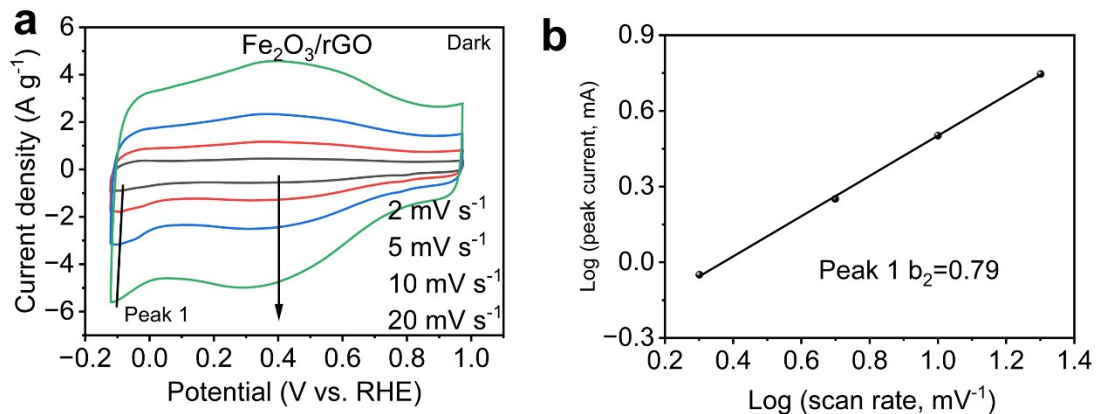

**Figure S9.** (a) CV curves of Fe<sub>2</sub>O<sub>3</sub>/rGO at different scan rates. (b) Logarithm relationship between peak current density and scan rate for Fe<sub>2</sub>O<sub>3</sub>/rGO in the dark.

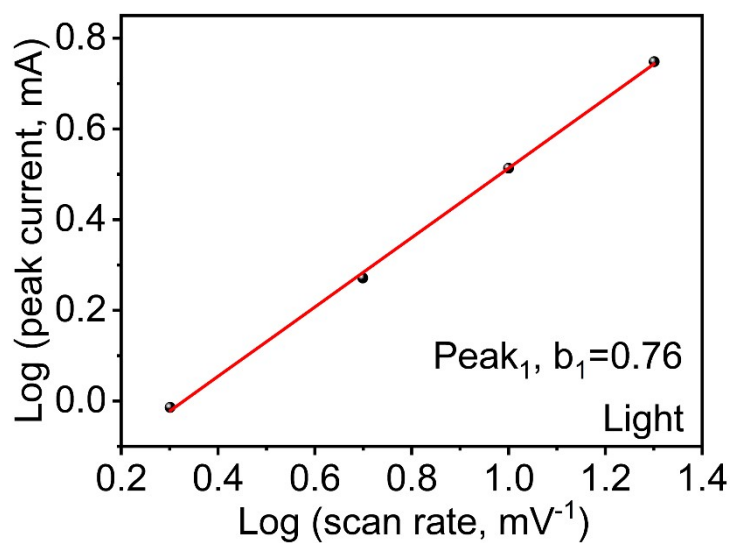

**Figure S10.** Logarithm relationship between peak current density and scan rate of the Fe<sub>2</sub>O<sub>3</sub>/rGO under illumination.

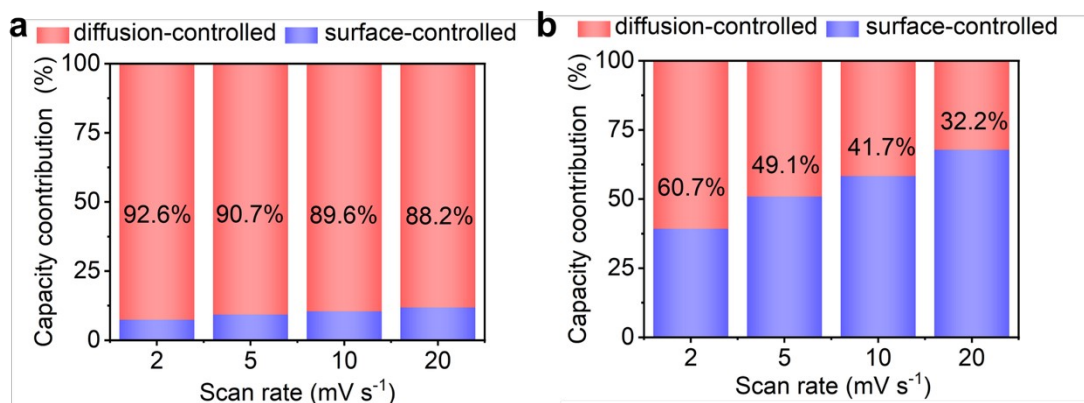

**Figure S11.** (a) Quantitative contributions of the surface-controlled capacity at different scan rate from 2 to 20 mV s<sup>-1</sup> in the dark. (b) Quantitative contributions of the surface-controlled capacity at different scan rates from 2 to 20 mV s<sup>-1</sup> under illumination.

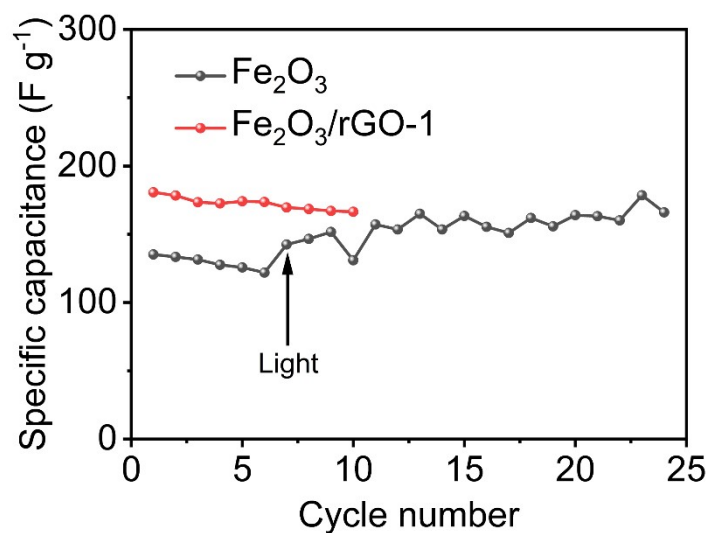

**Figure S12.** Comparison of the cycling performances of Fe<sub>2</sub>O<sub>3</sub> and Fe<sub>2</sub>O<sub>3</sub>/rGO-1 at a current density of 2 A g<sup>-1</sup>.

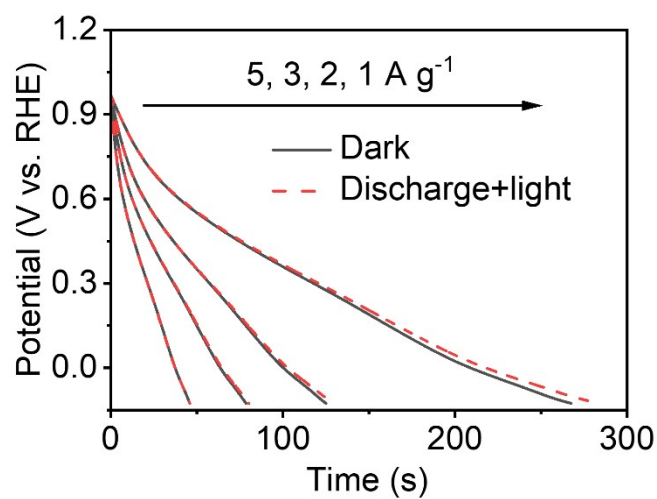

**Figure S13.** Galvanostatic discharge curves of Fe<sub>2</sub>O<sub>3</sub>/rGO under dark and illuminated conditions at current densities of 1, 2, 3, and 5 A g<sup>-1</sup>.

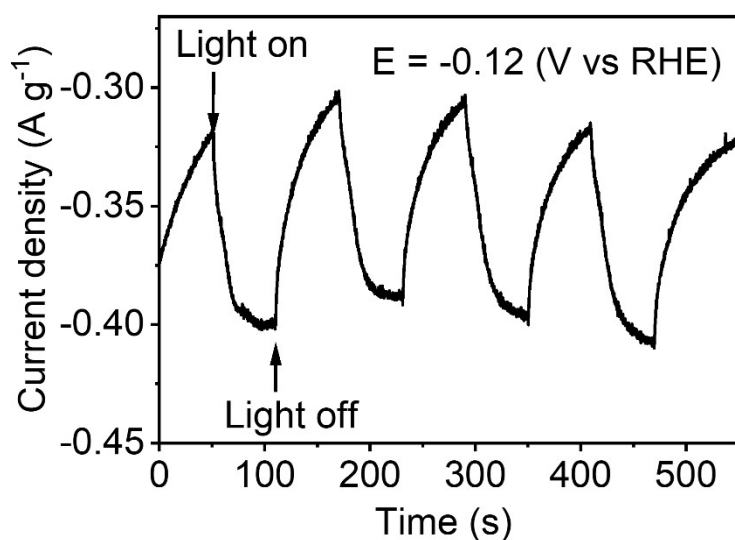

**Figure S14.** Transient photocurrent response of Fe<sub>2</sub>O<sub>3</sub>/rGO under repeated light on/off cycles.

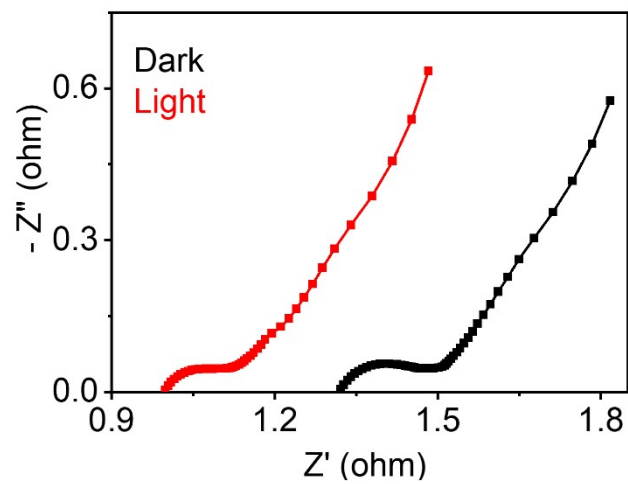

**Figure S15.** Nyquist plots of  $\text{Fe}_2\text{O}_3/\text{rGO}$  measured under dark and illuminated conditions.

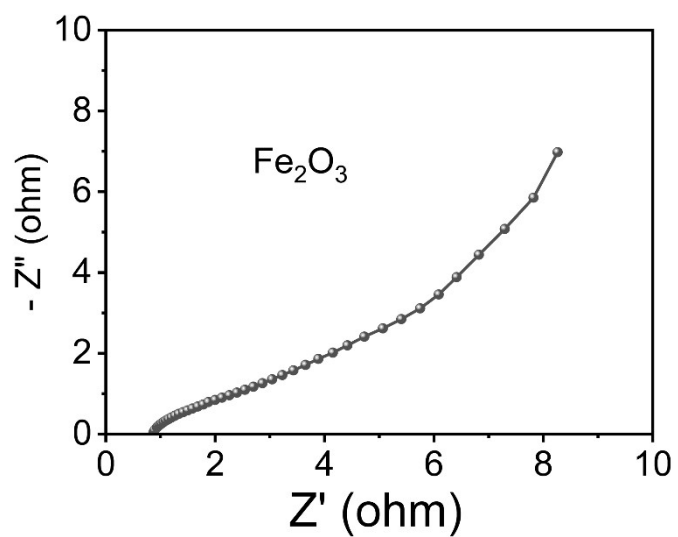

**Figure S16.** Nyquist plot of the  $\text{Fe}_2\text{O}_3$  in the dark.

**Table S1.** Comparison of the photo-assisted supercapacitor performance of this work with that of recent reports.

| Electrode                                               | Light               | Specific capacitance                                  | Ref.      |
|---------------------------------------------------------|---------------------|-------------------------------------------------------|-----------|
| Fe <sub>2</sub> O <sub>3</sub> /rGO                     | 8W<br>UV LED        | 249 F g <sup>-1</sup> (2 A g <sup>-1</sup> , 19%)     | Our works |
| CNT@Co <sub>2</sub> V <sub>2</sub> O <sub>7</sub> /BPQD | Xe-lamp             | 210 F g <sup>-1</sup> (2 A g <sup>-1</sup> , 35.6%)   | 1         |
| GN/MnO <sub>2</sub>                                     | 300 W<br>Xenon lamp | 210 F g <sup>-1</sup> (0.7 A g <sup>-1</sup> , 23.5%) | 2         |
| Co <sub>3</sub> O <sub>4</sub> nanospheres              | 500 W<br>Xenon lamp | 523 F g <sup>-1</sup> (1 A g <sup>-1</sup> , 16.7%)   | 3         |
| ZCO NF                                                  | 500 W<br>Xenon lamp | 563 F g <sup>-1</sup> (1 A g <sup>-1</sup> , 21.9%)   | 4         |
| BiFeO <sub>3</sub>                                      | 300 W<br>Xenon lamp | 110.5 F g <sup>-1</sup> (2 A g <sup>-1</sup> , 26.7%) | 5         |
| N-Ov-MCO                                                | 500 W<br>Xenon lamp | 567 F g <sup>-1</sup> (1 A g <sup>-1</sup> , 20.7%)   | 6         |
| Ni-BiOBr//rGO                                           | 125 W<br>LED lamp   | 136 F g <sup>-1</sup> (1 A g <sup>-1</sup> , 123.6%)  | 7         |

## References

- [1]. Y. Liu, X. Chen, B. Mao, Y. Ying, L. Li and W. Shi, *J. Mater. Sci. Technol.*, 2024, 191, 80.
- [2]. Y. Zhao, X. Wang, H. Li, B. Qian, Y. Zhang and Y. Wu, *Chem. Eng. J.*, 2022, 431, 133981.
- [3]. Y. Liu, N. Wang, W. Li, Y. Wang and L. Liang, *J. Scie. Adv. Mater. Dev.*, 2024, 9, 100771.
- [4]. Y. Zhao, H. Li, R. Tang, X. Wang, Y. Wu, S. Yan and Y. Zhang, *J. Mater. Chem. A*, 2023, 11, 15844.
- [5]. M. Samtham, A. Patil, E. Choudhary, H. Srivastava, R. Jangir, R. J. Choudhary and R. S. Devan, *Small Meth.*, 2025, 9, e2401441.
- [6]. R. Tang, H. Li, Y. Zhang, Y. Zhao and Y. Wu, *J. Energy Storage*, 2025, 110, 115237.
- [7]. A. Khampunbut, S. Kheawhom, W. Limphirat and P. Pattananuwat, *Electrochim.*

*Acta*, 2023, 443, 141979.
